# Supplementary material
Source: Springer Nature journal article supplement (https://www.springermedizin.de/resource/supplementary/12955_2008_457_MOESM3_ESM.pdf/9560498)

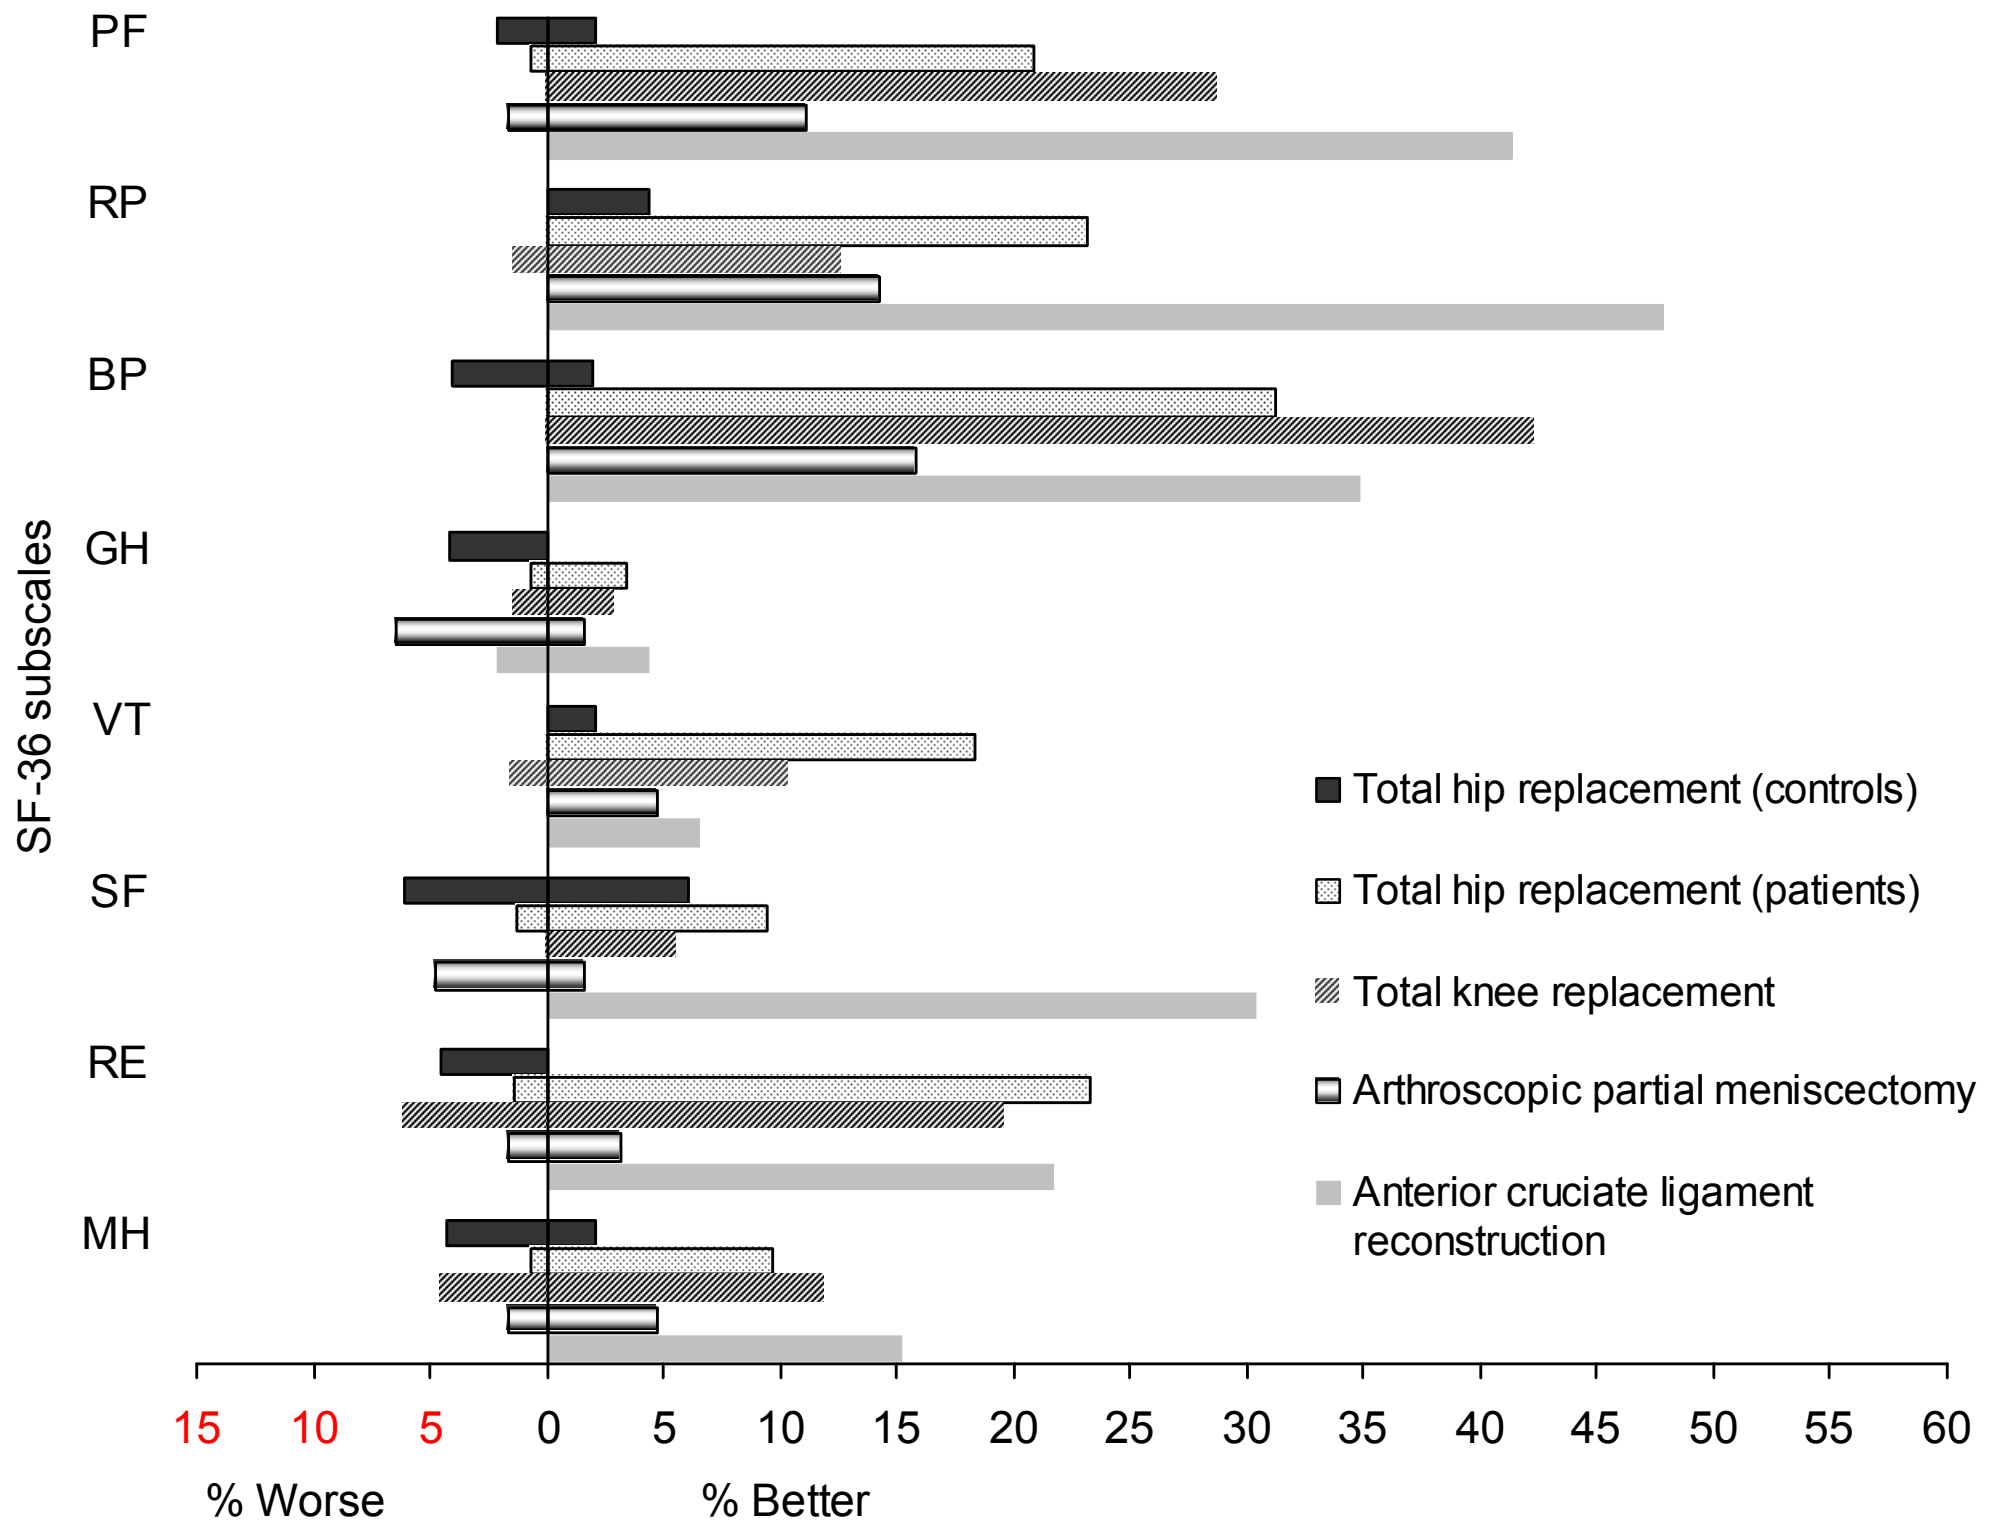

Supplement: MOESM3 [file 9560498]
